# Supplementary material for: Mortality after multivessel revascularisation involving the proximal left anterior descending artery
Source: HighWire-hosted journal article supplement (doi:10.1136/heartjnl-2022-320934), 2022-06-22
Supplement: heartjnl-2022-320934supp001_data_supplement.pdf [file heartjnl-2022-320934supp001_data_supplement.pdf]

**Mortality after Multivessel Revascularization Involving the Proximal Left  
Anterior Descending Artery**

**Supplementary Appendix**

### Supplementary Figure Legends

#### **Online Figure 1. Calibration Plot of the SYNTAX score II 2020 for all-cause mortality in patients with or without involvement of P-LAD lesion**

Triangles represent five quintiles of patients with mean predicted probability and mean observed all-cause mortality rate with 95% confidence interval. The diagonal blue lines represent perfect calibration. The red lines and gray area indicate flexible calibration curves and their 95% confidence intervals, respectively. The distribution of patients is indicated with spike at the bottom of the graph, stratified by outcomes (deaths above the x-axis and survivors below the x-axis).

#### **Online Figure 2. Calibration plot showing the observed versus predicted treatment benefit in patients with P-LAD (A) and without P-LAD (B).**

The percentages red (A) or blue (B) figuring in the illustration are the absolute risk differences in all-cause death at 10 years between CABG and PCI in each quarter for the patients with and without P-LAD lesion, respectively. Vertical dashed lines represent quartiles of the predicted treatment benefit of CABG over PCI, and the small circles and solid lines represent mean values of the absolute risk differences between CABG and PCI in each quartile and their 95% confidence intervals, respectively. The red or blue curves are calibration plots of the model in each group. The diagonal lines represent perfect calibration.

#### **Online Figure 3. Kaplan-Meier plots showing the observed versus predicted treatment benefit of CABG over PCI according to the SYNTAX score II 2020 in predicted benefit quarters in patients with or without P-LAD**

There were the trends that the beneficial effects of CABG over PCI were more amplified in higher quartile groups according to predicted benefit by the SYNTAX score II 2020 among patients with or without P-LAD lesion.

#### **Online Figure 4. Individual plots of predicted mortality after PCI or CABG by the SYNTAX score II 2020 and observed mortality at 10 years in patients with proximal LAD lesion.**

The case number is according to the order of treatment benefit predicted by the SYNTAX score II 2020, where higher number indicates higher predicted survival benefit of CABG over PCI. Blue and Red solid lines indicate predicted 10-year mortality risks after PCI and CABG, respectively, whereas Blue and Red dashed lines indicate observed 10-year mortality rates after PCI and CABG, respectively.

#### **Online Figure 5. Individual plots of predicted mortality after PCI or CABG by the SYNTAX score II 2020 and observed mortality at 10 years in patients without proximal LAD lesion.**

The case number is according to the order of treatment benefit predicted by the SYNTAX score II 2020, where higher number indicates higher predicted survival benefit of CABG over PCI. Blue and Red solid lines indicate predicted 10-year mortality risks after PCI and CABG, respectively, whereas Blue and Red dashed lines indicate observed 10-year mortality rates after PCI and CABG, respectively.

Online Figure 1.

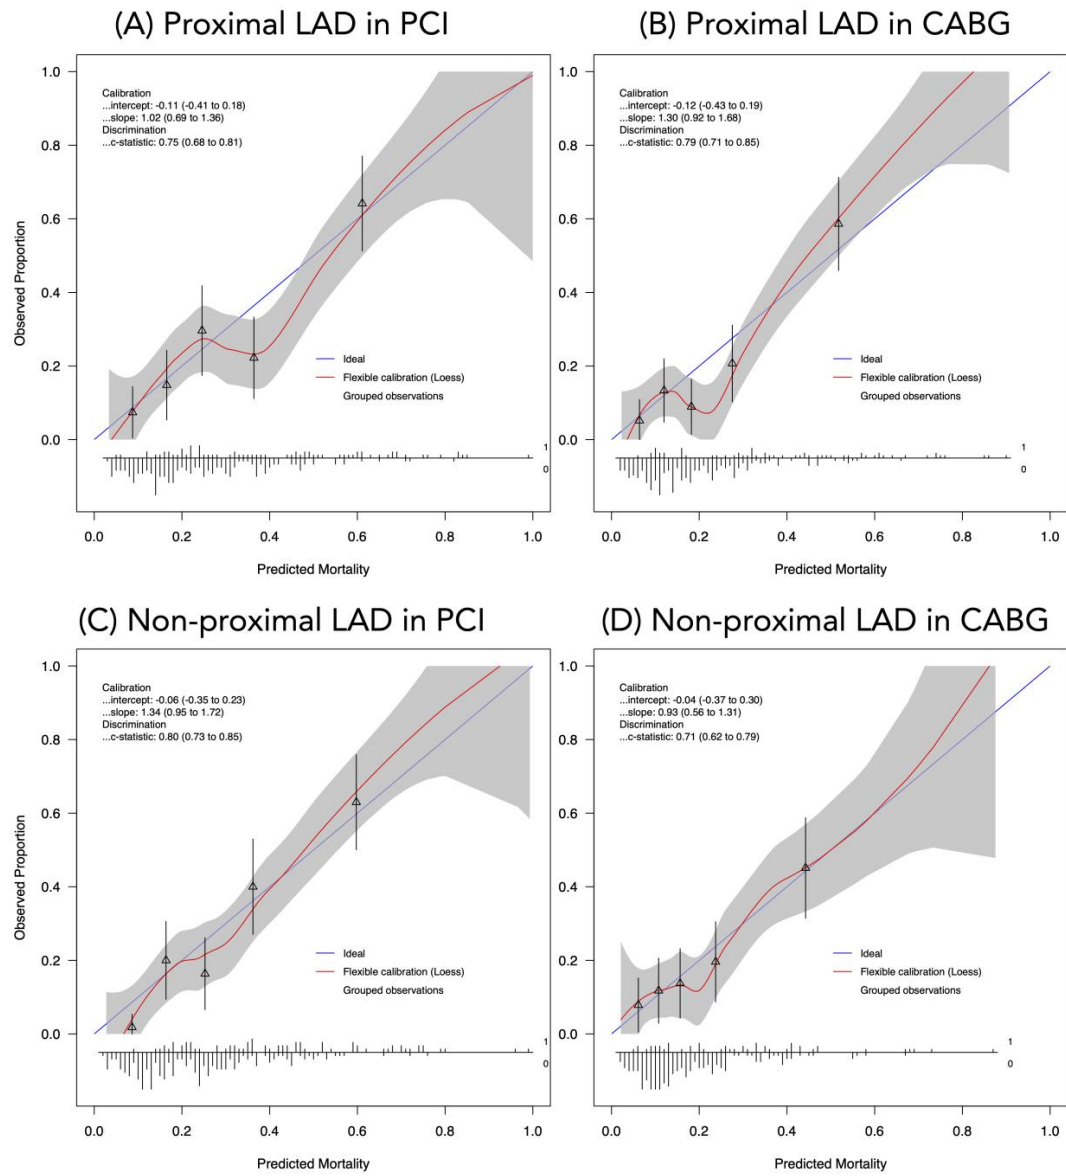

Online Figure 2

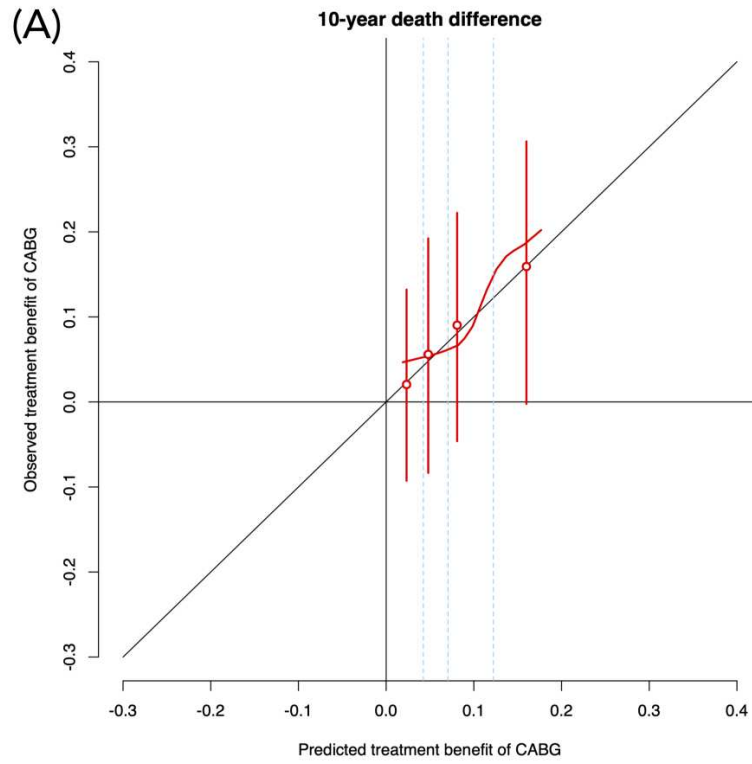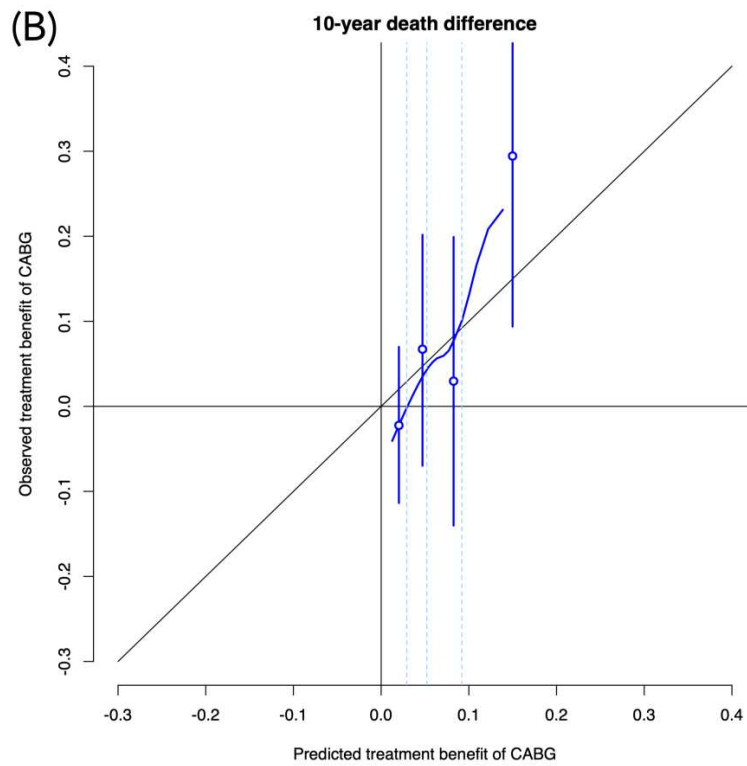

Online Figure 3

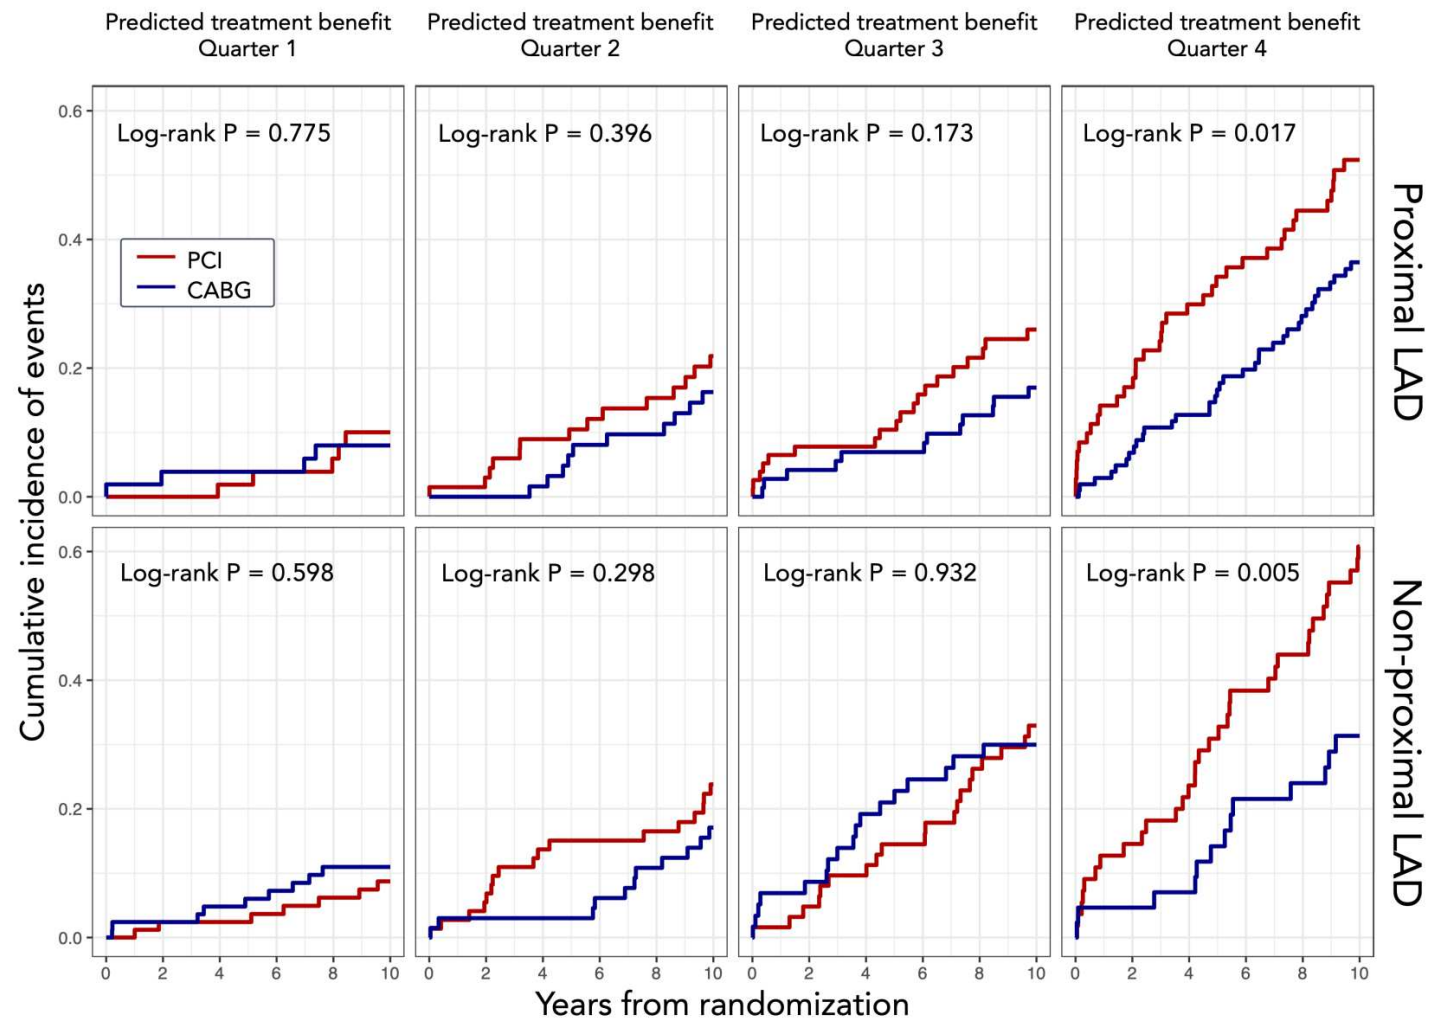

Online Figure 4

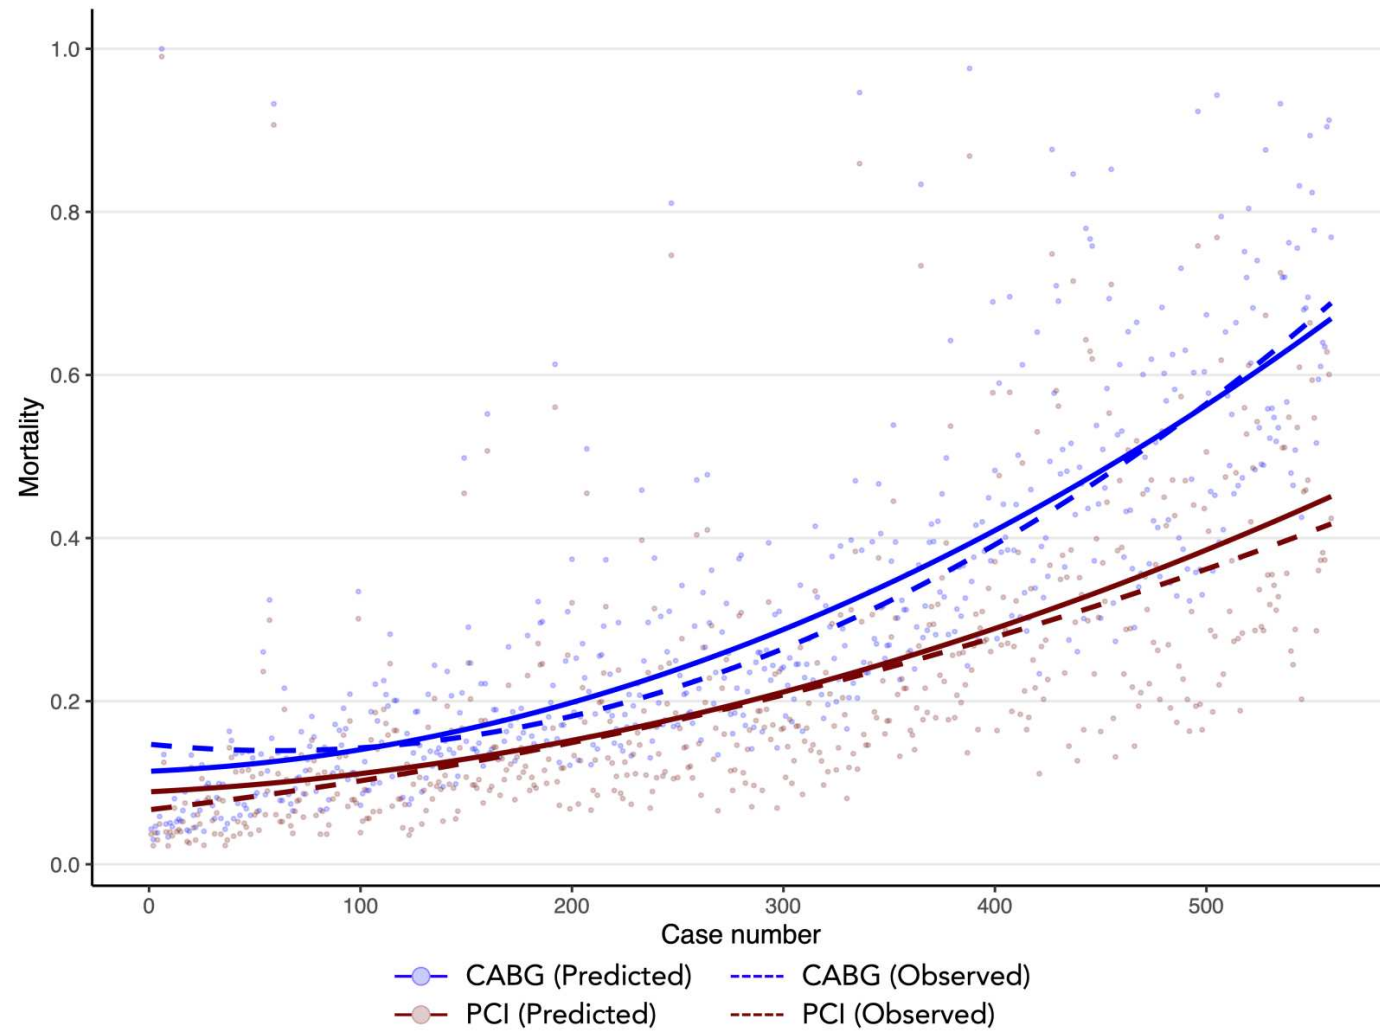

Online Figure 5

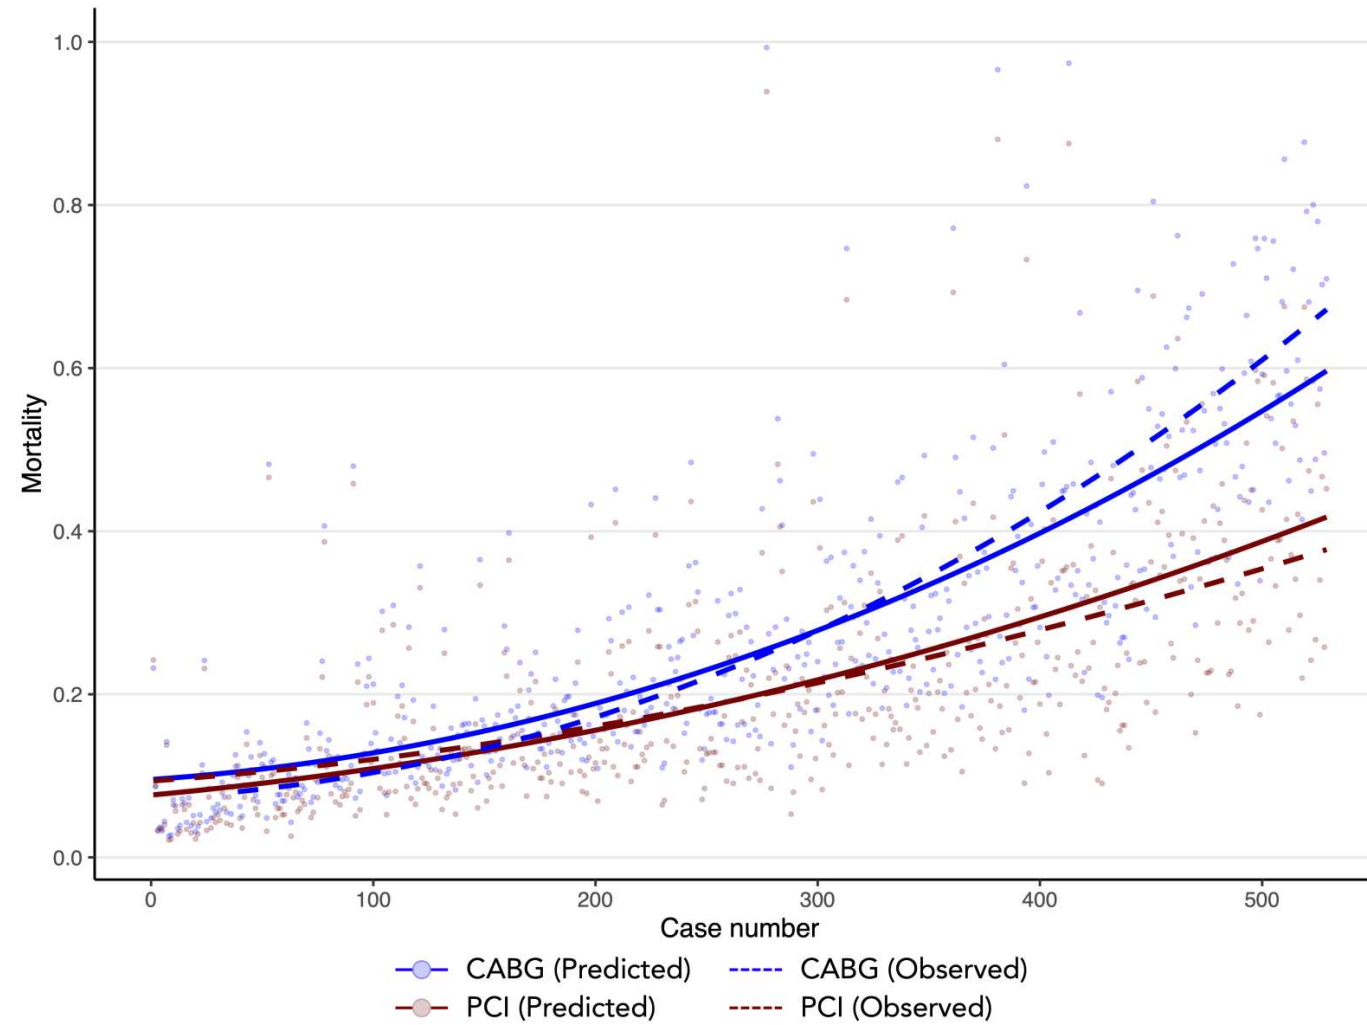

**Online Table 1. Baseline characteristics in randomized revascularization arms with or without involvement of proximal LAD lesion**

|                                      | Proximal LAD   |                 |              | Non-proximal LAD |                 |              |
|--------------------------------------|----------------|-----------------|--------------|------------------|-----------------|--------------|
|                                      | PCI<br>N = 269 | CABG<br>N = 290 | P value      | PCI<br>N = 274   | CABG<br>N = 255 | P value      |
| Mid LAD lesion                       | 71.4 (192/269) | 75.9 (220/290)  | 0.249        | 93.8 (257/274)   | 92.9 (237/255)  | 0.729        |
| Apical LAD lesion                    | 14.5 (39/269)  | 15.2 (44/290)   | 0.905        | 21.9 (60/274)    | 18.8 (48/255)   | 0.390        |
| Age (year)                           | 66 (58-72)     | 66 (59-72)      | <b>0.018</b> | 66 (60-73)       | 64 (57-72)      | 0.464        |
| Sex                                  |                |                 | 0.832        |                  |                 | 0.157        |
| Male                                 | 80.7 (217/269) | 79.7 (231/290)  |              | 77.7 (213/274)   | 82.7 (211/255)  |              |
| Female                               | 19.3 (52/269)  | 20.3 (59/290)   |              | 22.3 (61/274)    | 17.3 (44/255)   |              |
| Body mass index (kg/m <sup>2</sup> ) | 27 (25-30)     | 28 (25-30)      | 0.760        | 27 (25-31)       | 27 (25-31)      | 0.631        |
| Diabetes                             | 25.3 (68/269)  | 30.0 (87/290)   | 0.220        | 30.7 (84/274)    | 22.0 (56/255)   | <b>0.030</b> |
| On insulin                           | 9.7 (26/269)   | 12.8 (37/290)   | 0.285        | 12.8 (35/274)    | 8.6 (22/255)    | 0.160        |
| Metabolic syndrome                   | 47.2 (103/218) | 50.4 (114/226)  | 0.508        | 50.4 (115/228)   | 48.7 (95/195)   | 0.770        |
| Hypertension                         | 69.1 (186/269) | 63.1 (183/290)  | 0.153        | 71.2 (195/274)   | 67.5 (172/255)  | 0.396        |
| Dyslipidemia                         | 75.7 (202/267) | 79.1 (227/287)  | 0.361        | 78.4 (211/269)   | 77.9 (197/253)  | 0.916        |
| Current smoking                      | 20.1 (54/269)  | 20.3 (59/290)   | 1.000        | 17.5 (48/274)    | 21.3 (54/254)   | 0.321        |
| Previous MI                          | 29.7 (79/266)  | 37.2 (107/288)  | 0.072        | 39.0 (105/269)   | 41.5 (105/253)  | 0.593        |
| Previous cerebrovascular disease     | 13.0 (35/269)  | 15.0 (43/287)   | 0.542        | 11.7 (32/273)    | 15.4 (39/254)   | 0.251        |
| Previous stroke                      | 4.5 (12/269)   | 4.5 (13/288)    | 1.000        | 3.3 (9/272)      | 6.3 (16/254)    | 0.150        |
| Previous TIA                         | 3.0 (8/269)    | 5.2 (15/287)    | 0.206        | 5.5 (15/272)     | 6.3 (16/254)    | 0.715        |
| Previous carotid artery disease      | 8.9 (24/269)   | 8.3 (24/290)    | 0.880        | 6.6 (18/274)     | 6.7 (17/255)    | 1.000        |
| Peripheral vascular disease          | 8.6 (23/269)   | 9.3 (27/290)    | 0.769        | 8.0 (22/274)     | 11.0 (28/255)   | 0.298        |
| COPD                                 | 7.1 (19/269)   | 8.6 (25/290)    | 0.532        | 8.4 (23/274)     | 10.2 (26/255)   | 0.549        |
| Chronic kidney disease               | 18.0 (45/250)  | 21.4 (54/252)   | 0.370        | 20.6 (54/262)    | 16.3 (36/221)   | 0.242        |
| Creatinine clearance (ml/min)        | 81 (66-104)    | 79 (62-100)     | 0.105        | 79 (63-100)      | 85 (67-106)     | 0.166        |
| LVEF (%)                             | 60 (52-68)     | 60 (50-65)      | 0.948        | 60 (53-65)       | 60 (50-65)      | 0.257        |



|                                                     |                  |                  |        |                  |                 |        |
|-----------------------------------------------------|------------------|------------------|--------|------------------|-----------------|--------|
| Congestive heart failure                            | 4.1 (11/268)     | 6.3 (18/286)     | 0.260  | 4.4 (12/272)     | 5.2 (13/250)    | 0.687  |
| Clinical presentation                               |                  |                  |        |                  |                 |        |
| Silent ischemia                                     | 14.1 (38/269)    | 12.1 (35/290)    | 0.530  | 13.1 (36/274)    | 16.1 (41/255)   | 0.388  |
| Stable angina                                       | 59.1 (159/269)   | 63.1 (183/290)   | 0.341  | 58.4 (160/274)   | 53.3 (136/255)  | 0.255  |
| Unstable angina                                     | 26.8 (72/269)    | 24.8 (72/290)    | 0.629  | 28.5 (78/274)    | 30.6 (78/255)   | 0.634  |
| EuroSCORE                                           | 3 (2-5)          | 4 (2-5)          | 0.252  | 4 (2-5)          | 3 (2-5)         | 0.180  |
| Parsonnet SCORE                                     | 6 (3-12)         | 6 (3-12)         | 0.043  | 6 (4-13)         | 6 (3-10)        | 0.722  |
| Disease type                                        |                  |                  | 0.422  |                  |                 | 0.753  |
| 2VD (No LMCAD)                                      | 3.7 (10/269)     | 5.2 (15/290)     |        | 2.2 (6/274)      | 1.6 (4/255)     |        |
| 3VD (No LMCAD)                                      | 96.3 (259/269)   | 94.8 (275/290)   |        | 97.8 (268/274)   | 98.4 (251/255)  |        |
| Number of lesions                                   | 5 (4-6)          | 5 (4-6)          | 0.853  | 5 (4-6)          | 5 (4-6)         | 0.278  |
| SYNTAX score                                        | 30 (23-36)       | 30 (25-39)       | 0.863  | 24 (18-31)       | 24 (18-30)      | 0.099  |
| SYNTAX score tercile                                |                  |                  |        |                  |                 |        |
| Low                                                 | 22.3 (60/269)    | 19.3 (56/290)    | 0.405  | 44.2 (121/274)   | 45.1 (115/255)  | 0.861  |
| Intermediate                                        | 41.3 (111/269)   | 38.6 (112/290)   | 0.546  | 35.0 (96/274)    | 37.6 (96/255)   | 0.587  |
| High                                                | 36.4 (98/269)    | 42.1 (122/290)   | 0.194  | 20.8 (57/274)    | 17.3 (44/255)   | 0.320  |
| Predicted 10-year mortality rates by SS II 2020 (%) | 24.5 (14.9-39.5) | 17.8 (10.8-29.9) | <0.001 | 24.7 (14.2-40.0) | 15.5 (9.8-26.2) | <0.001 |
| Any total occlusion                                 | 29.7 (80/269)    | 27.9 (81/290)    | 0.642  | 29.2 (80/274)    | 27.5 (70/255)   | 0.700  |
| Any bifurcation                                     | 77.3 (208/269)   | 78.3 (227/290)   | 0.839  | 71.5 (196/274)   | 71.0 (181/255)  | 0.924  |
| Number of stents                                    | 5 (4-6)          | -                | -      | 5 (4-6)          | -               | -      |
| Total stent length per patient                      | 92 (68-120)      | -                | -      | 92 (68-124)      | -               | -      |
| Off pump CABG                                       | -                | 14.1 (39/277)    | -      | -                | 13.9 (33/237)   | -      |
| Number of total conduits                            | -                | 3 (2-3)          | -      | -                | 3 (2-3)         | -      |
| Number of arterial conduits                         | -                | 1 (1-2)          | -      | -                | 1 (1-2)         | -      |
| Number of venous conduits                           | -                | 1 (1-2)          | -      | -                | 1 (1-2)         | -      |
| Complete revascularization                          | 53.0 (142/268)   | 58.7 (165/281)   | 0.197  | 50.5 (138/273)   | 55.7 (136/244)  | 0.252  |

|                          |                |                |        |                |                |        |
|--------------------------|----------------|----------------|--------|----------------|----------------|--------|
| Medication at discharge  |                |                |        |                |                |        |
| Any antiplatelet therapy |                |                |        |                |                |        |
| Aspirin                  | 94.8 (254/268) | 87.9 (247/281) | 0.006  | 96.3 (263/273) | 85.2 (208/244) | <0.001 |
| Thienopyridine           | 96.3 (258/268) | 19.2 (54/281)  | <0.001 | 97.1 (265/273) | 21.7 (53/244)  | <0.001 |
| Statin                   | 84.0 (225/268) | 74.0 (208/281) | 0.005  | 87.9 (240/273) | 73.8 (180/244) | <0.001 |
| Beta blocker             | 81.7 (219/268) | 79.7 (224/281) | 0.589  | 80.2 (219/273) | 78.3 (191/244) | 0.589  |
| ACEI                     | 56.7 (152/268) | 43.8 (123/281) | 0.003  | 59.0 (161/273) | 48.0 (117/244) | 0.013  |
| ARB                      | 12.3 (33/268)  | 6.4 (18/281)   | 0.019  | 10.6 (29/273)  | 6.6 (16/244)   | 0.119  |

Data are presented as median (interquartile range) or percentage (number).

PCI: percutaneous coronary intervention; CABG: coronary artery bypass graft; MI: myocardial infarction; LVEF: left ventricular ejection fraction; LMCAD: left main coronary artery disease; 3VD: three vessel disease; 2VD: two vessel disease; SYNTAX: Synergy between PCI with Taxus and Cardiac Surgery; ACEI: angiotensin-converting-enzyme inhibitors; ARB: angiotensin II receptor blocker.
